# Supplementary material for: Effect of chemical substitution and external strain on phase stability and ferroelectricity in two dimensional M2CT2 MXenes
Source: Royal Society of Chemistry journal article supplement (doi:10.1039/d2nr00514j), 2022-01-01
Supplement: d2nr00514j1.pdf [file d2nr00514j1.pdf]

Supplementary Information for “Effect of Chemical Substitution and External Strain on Phase Stability and Ferroelectricity in Two Dimensional  $M_2CT_2$  MXenes”

Mo Li,<sup>1</sup> Olamide Omisakin,<sup>1</sup> Joshua Young<sup>1</sup>

Department of Chemical and Materials Engineering, New Jersey Institute of Technology,

I. Optimized structures

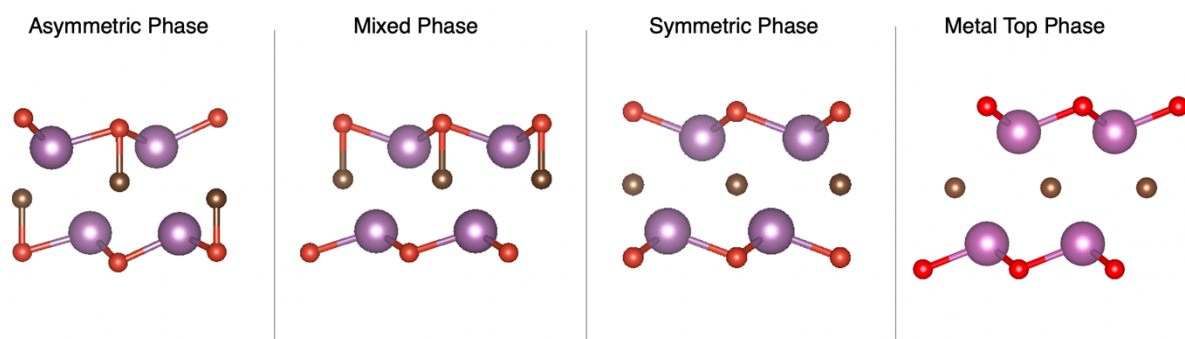

Figure S1. Fully relaxed structures for  $Sc_2CO_2$ .

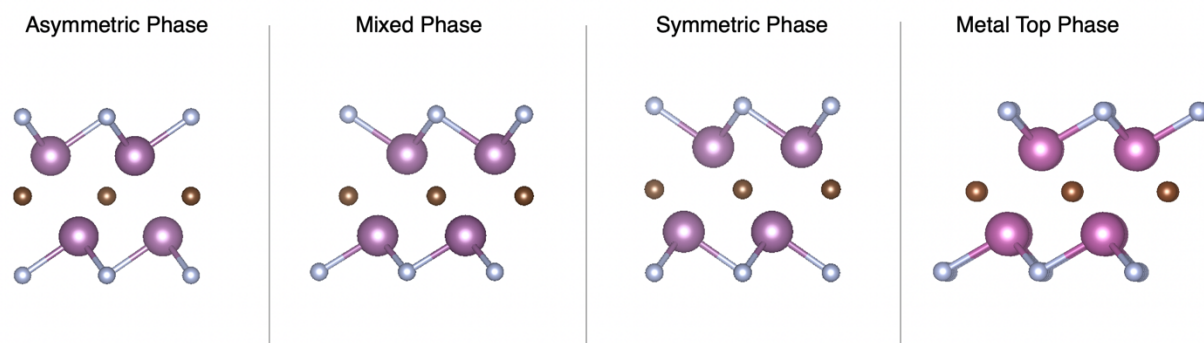

Figure S2. Fully relaxed structures for  $Sc_2CF_2$ .

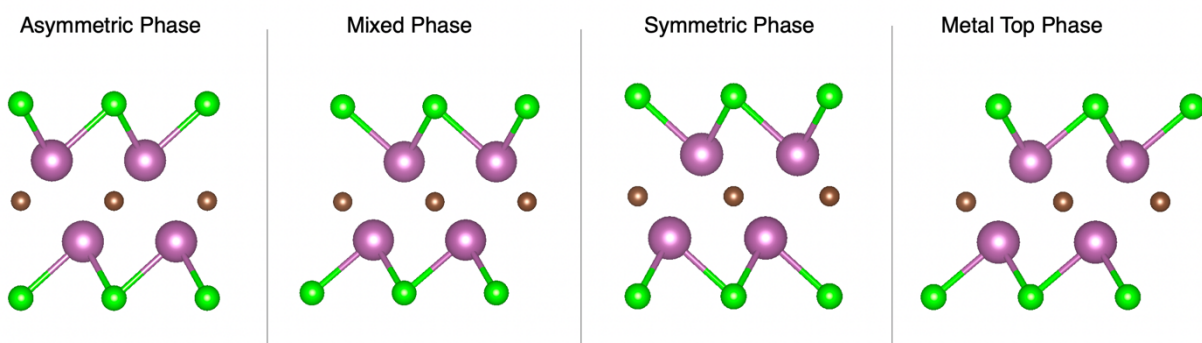

Figure S3. Fully relaxed structures for  $\text{Sc}_2\text{CCl}_2$ .

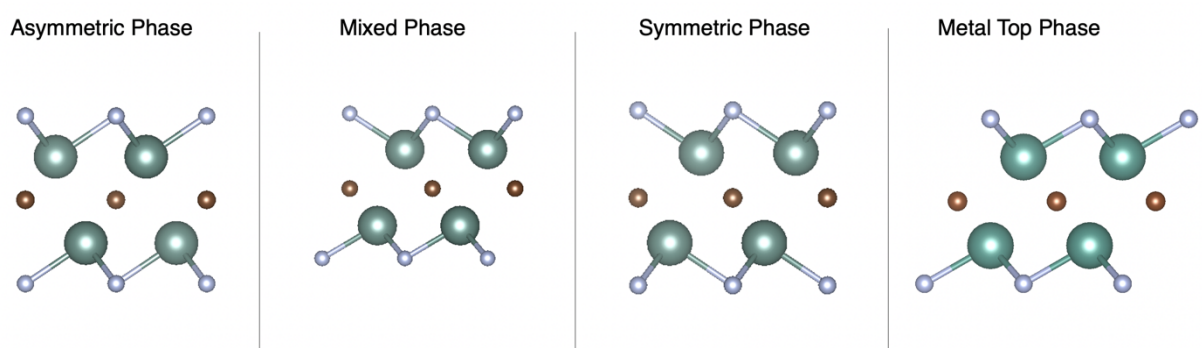

Figure S4. Fully relaxed structures for  $\text{Y}_2\text{CF}_2$ .

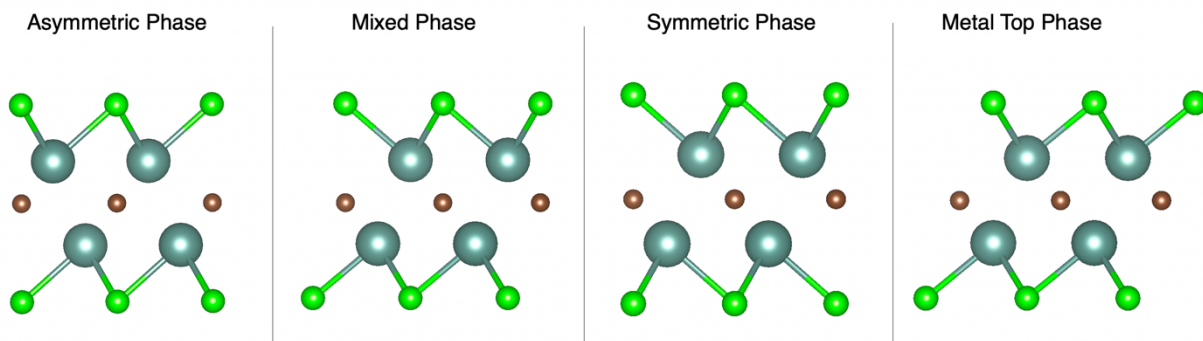

Figure S5. Fully relaxed structures for  $\text{Y}_2\text{CCl}_2$ .

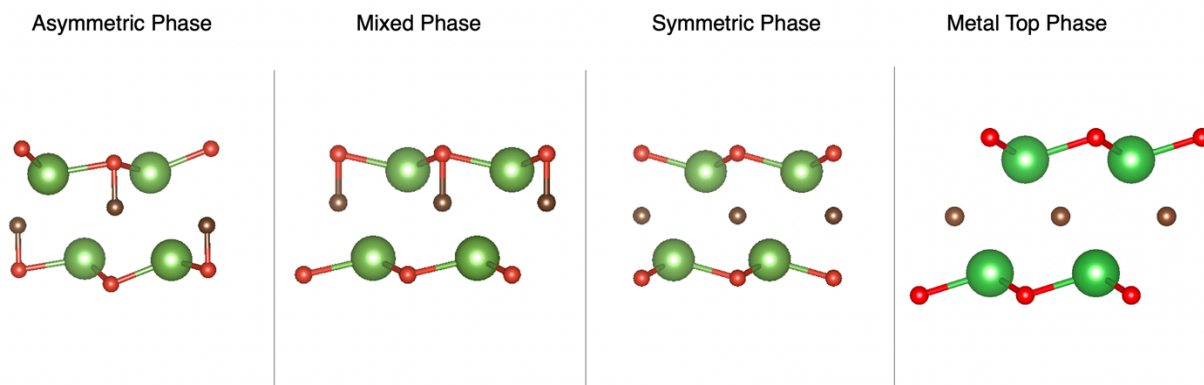

Figure S6. Fully relaxed structures for  $\text{La}_2\text{CO}_2$ .

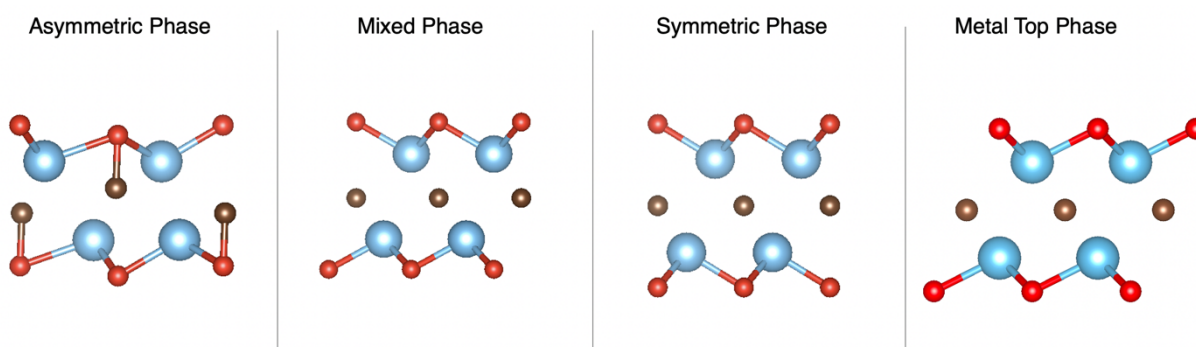

Figure S7. Fully relaxed structures for  $\text{Ti}_2\text{CO}_2$ .

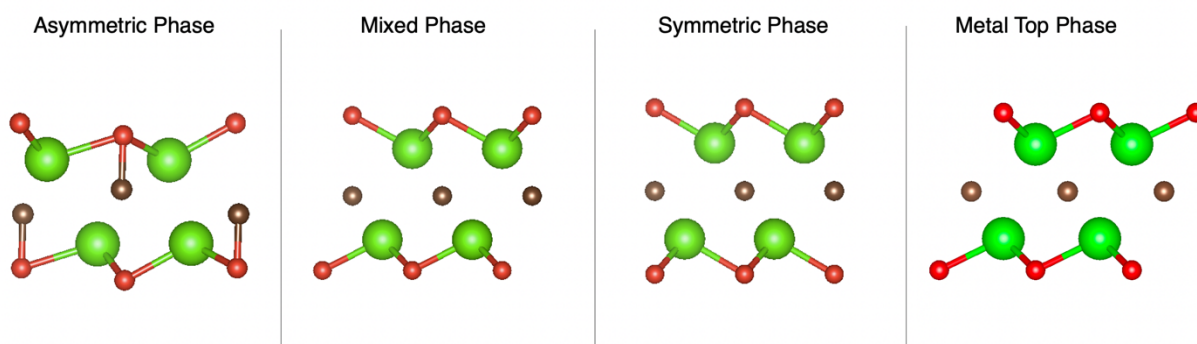

Figure S8. Fully relaxed structures for  $\text{Zr}_2\text{CO}_2$ .

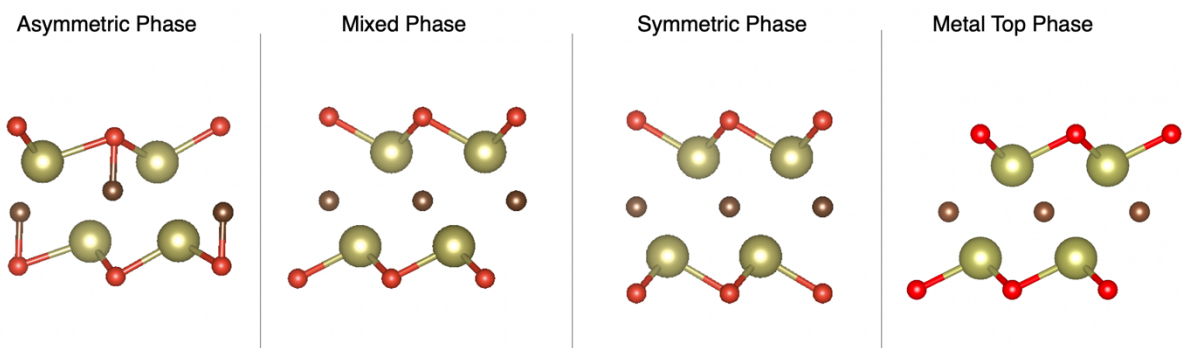

Figure S9. Fully relaxed structures for  $\text{Hf}_2\text{CO}_2$ .

## II. PBE Density of States

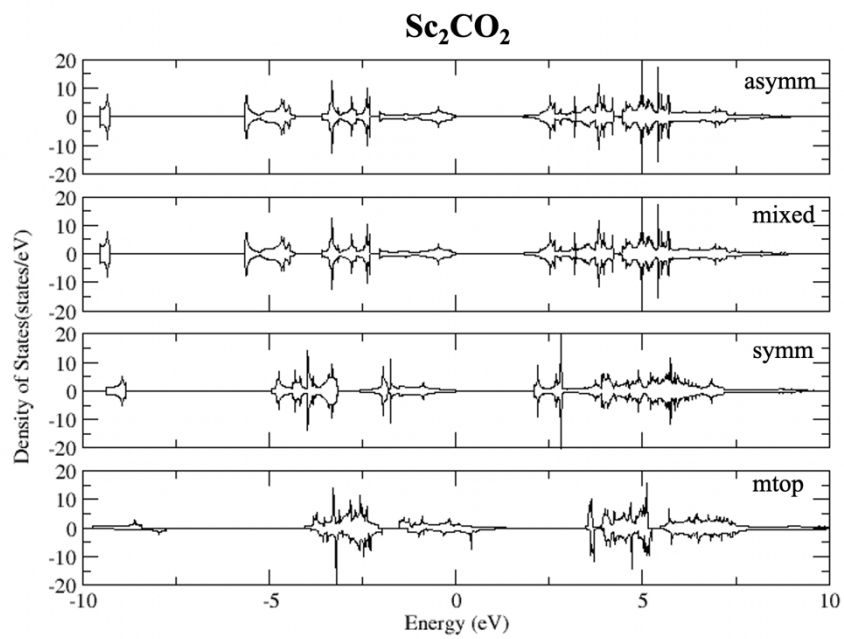

Figure S10. Density of states for  $\text{Sc}_2\text{CO}_2$  in the four studied phases.

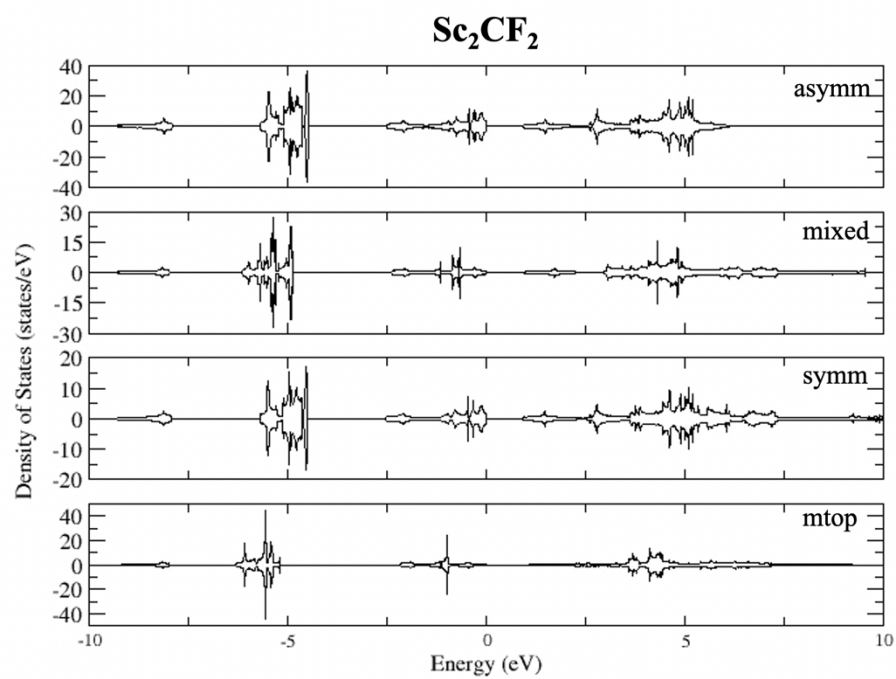

Figure S11. Density of states for Sc<sub>2</sub>CF<sub>2</sub> in the four studied phases.

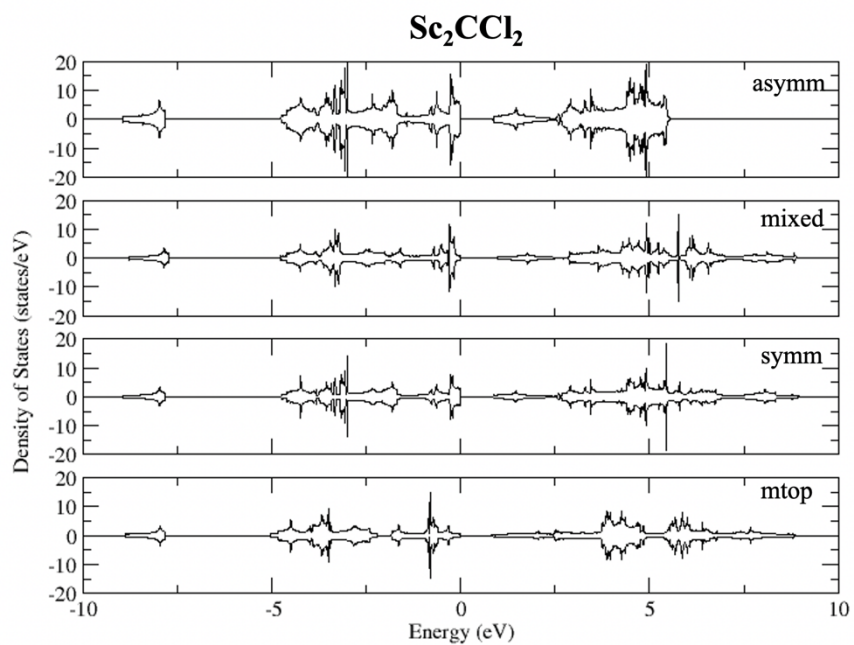

Figure S12. Density of states for Sc<sub>2</sub>CCl<sub>2</sub> in the four studied phases.

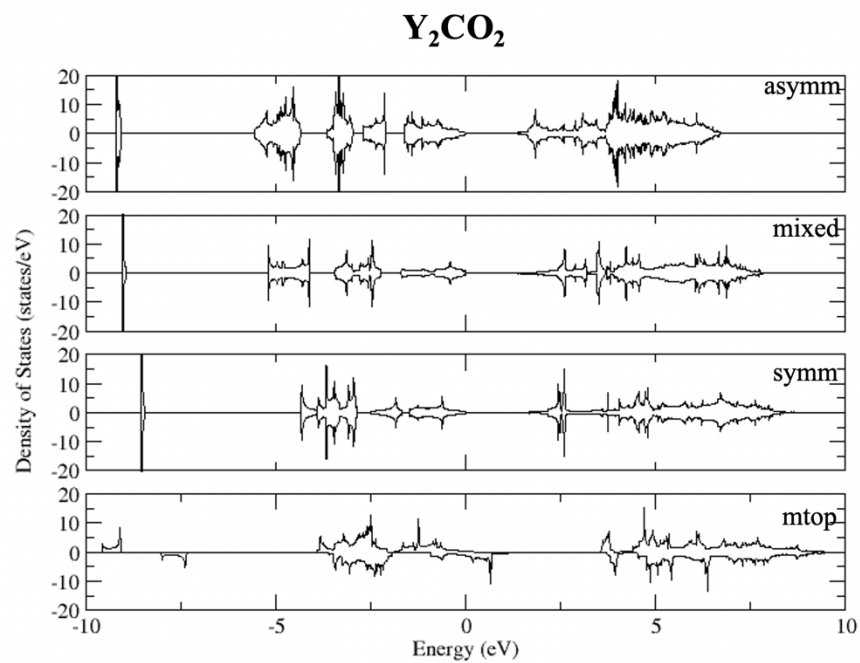

Figure S13. Density of states for Y<sub>2</sub>CO<sub>2</sub> in the four studied phases.

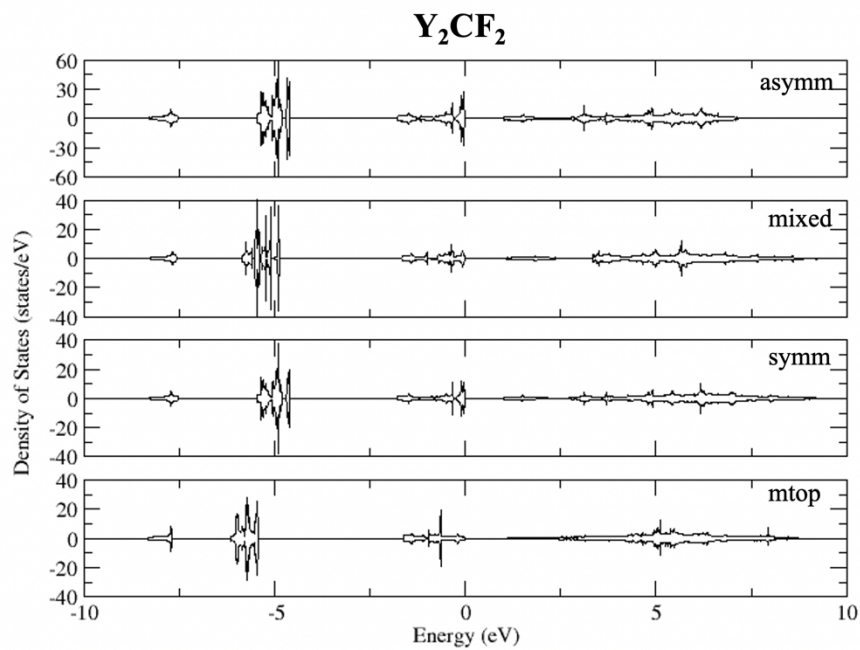

Figure S14. Density of states for Y<sub>2</sub>CF<sub>2</sub> in the four studied phases.

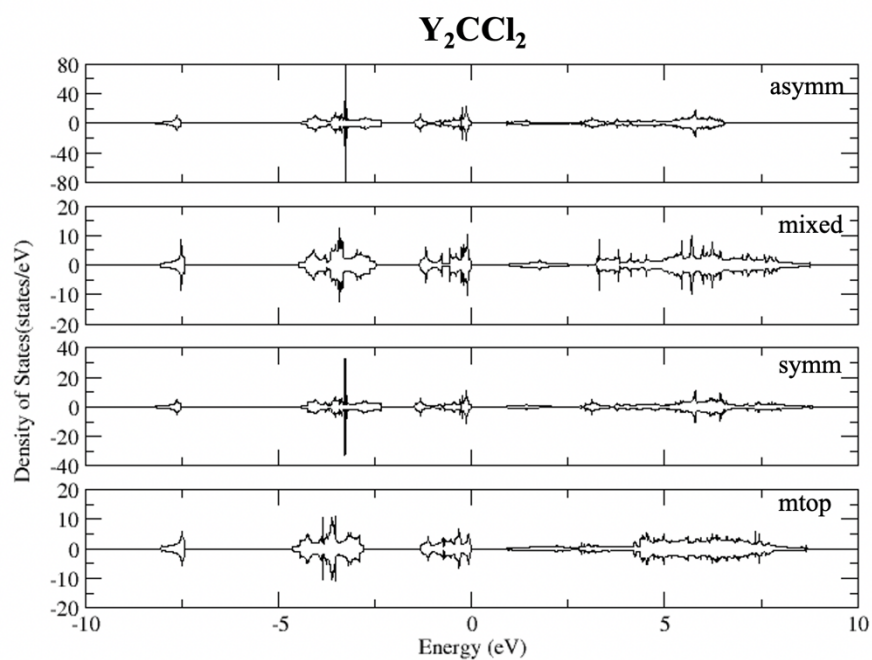

Figure S15. Density of states for Y<sub>2</sub>CCl<sub>2</sub> in the four studied phases.

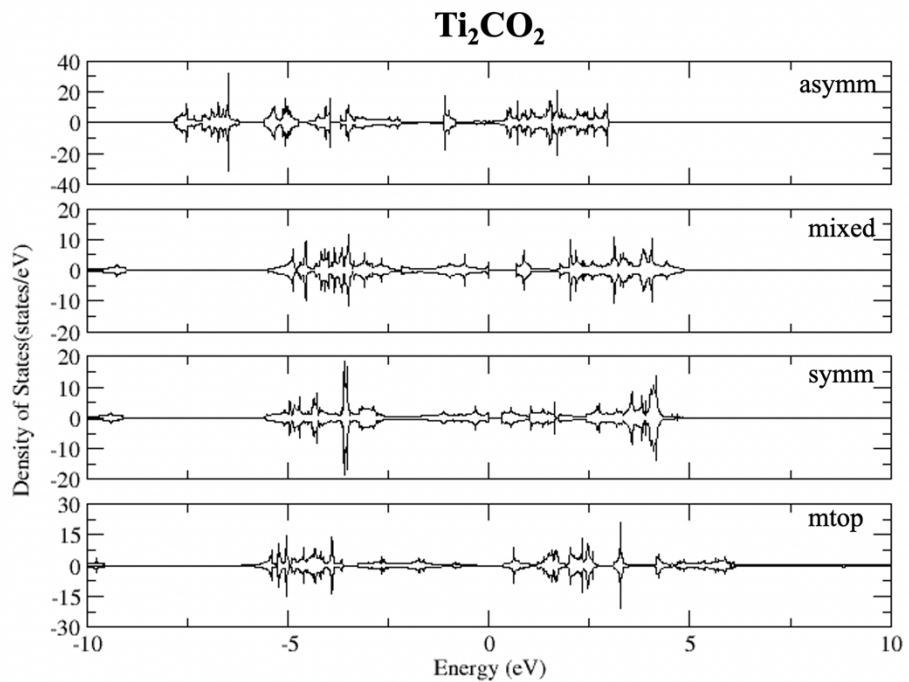

Figure S16. Density of states for Ti<sub>2</sub>CO<sub>2</sub> in the four studied phases.

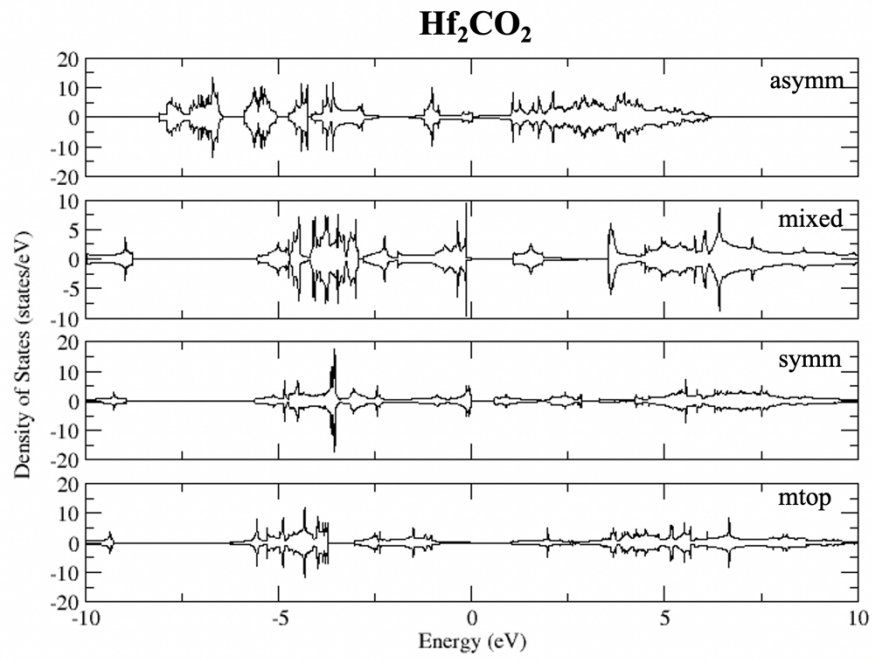

Figure S17. Density of states for Hf<sub>2</sub>CO<sub>2</sub> in the four studied phases.

### III. Phonon Stability

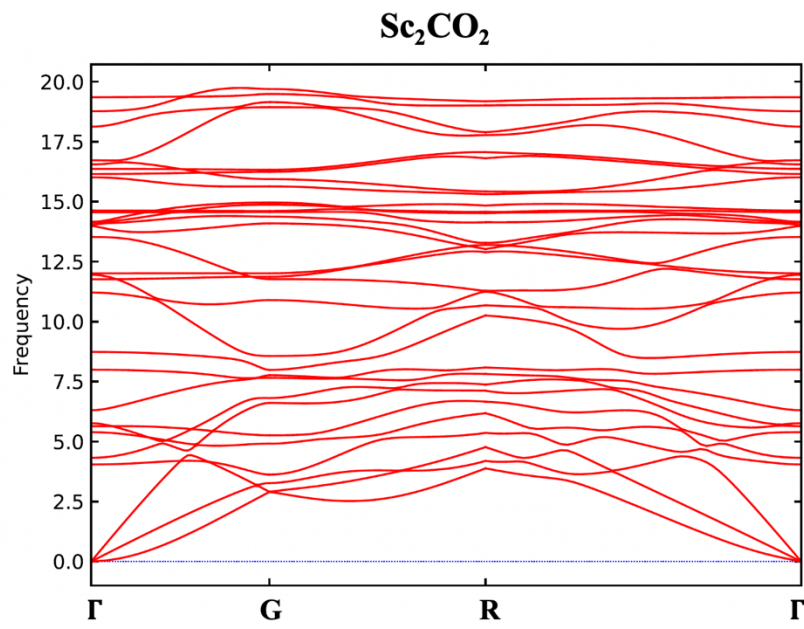

Figure S18. Phonon frequencies for Sc<sub>2</sub>CO<sub>2</sub> in the mixed phase.



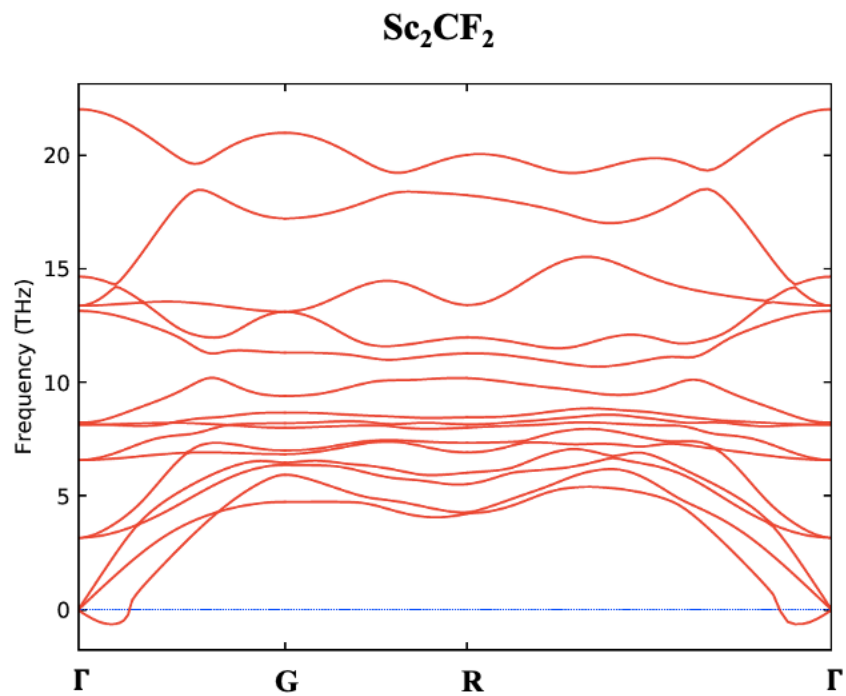

Figure S19. Phonon frequencies for Sc<sub>2</sub>CF<sub>2</sub> in the mixed phase.

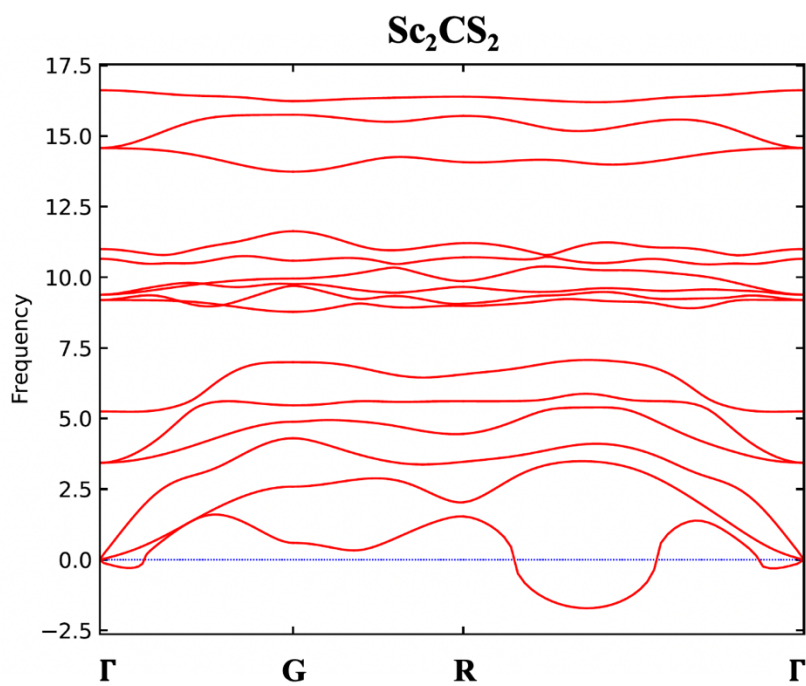

Figure S20. Phonon frequencies for Sc<sub>2</sub>CS<sub>2</sub> in the mixed phase.

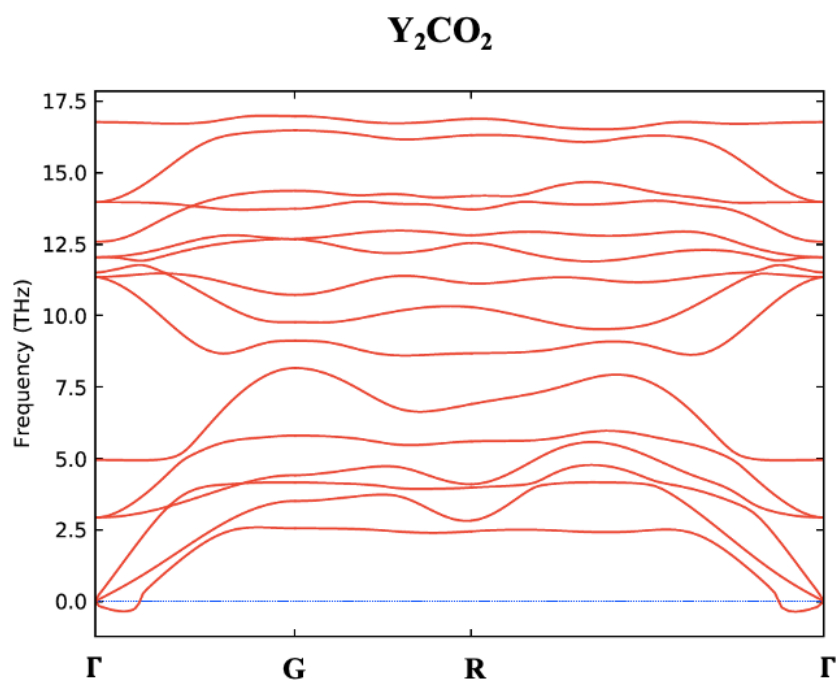

Figure S21. Phonon frequencies for Y<sub>2</sub>CO<sub>2</sub> in the mixed phase.

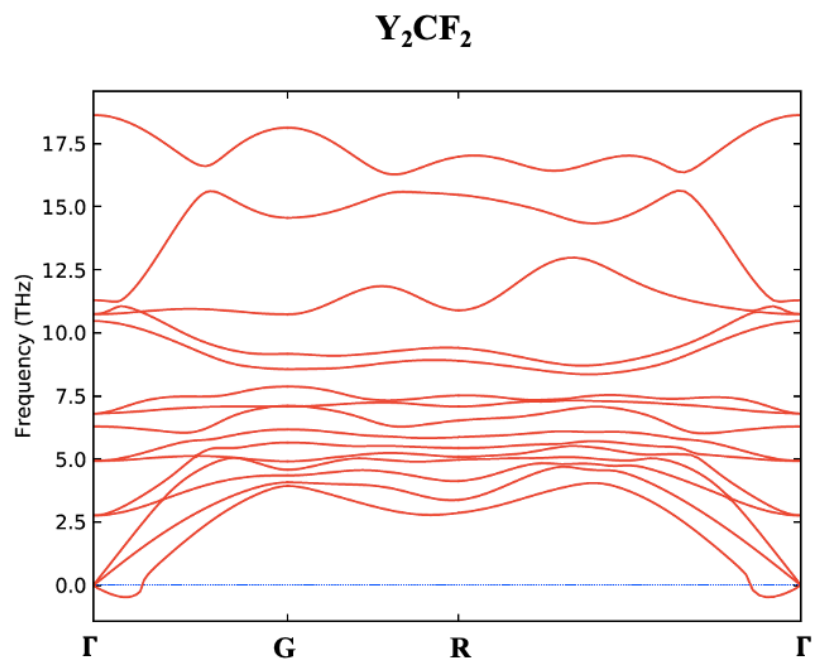

Figure S22. Phonon frequencies for Y<sub>2</sub>CF<sub>2</sub> in the mixed phase.

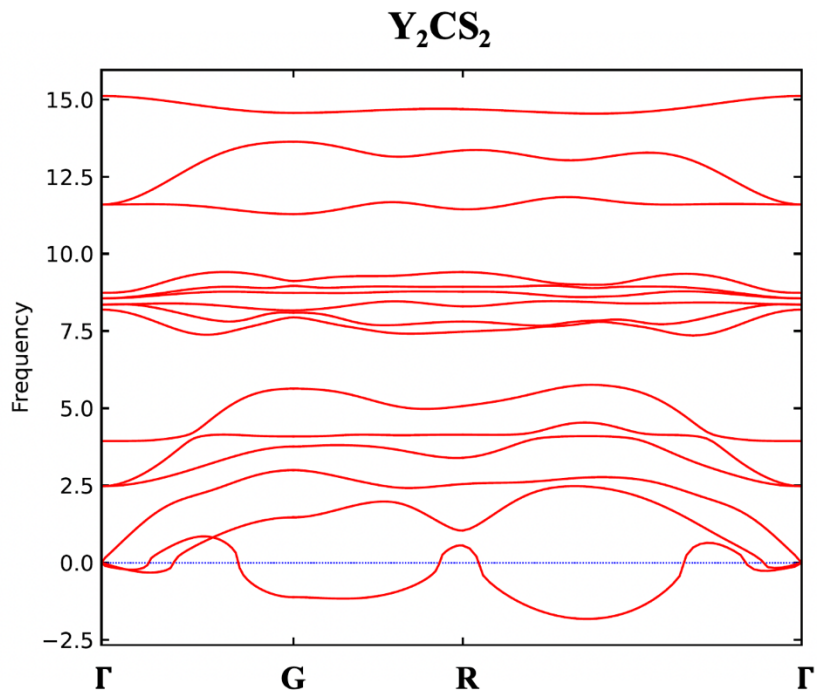

Figure S23. Phonon frequencies for Y<sub>2</sub>CS<sub>2</sub> in the mixed phase.

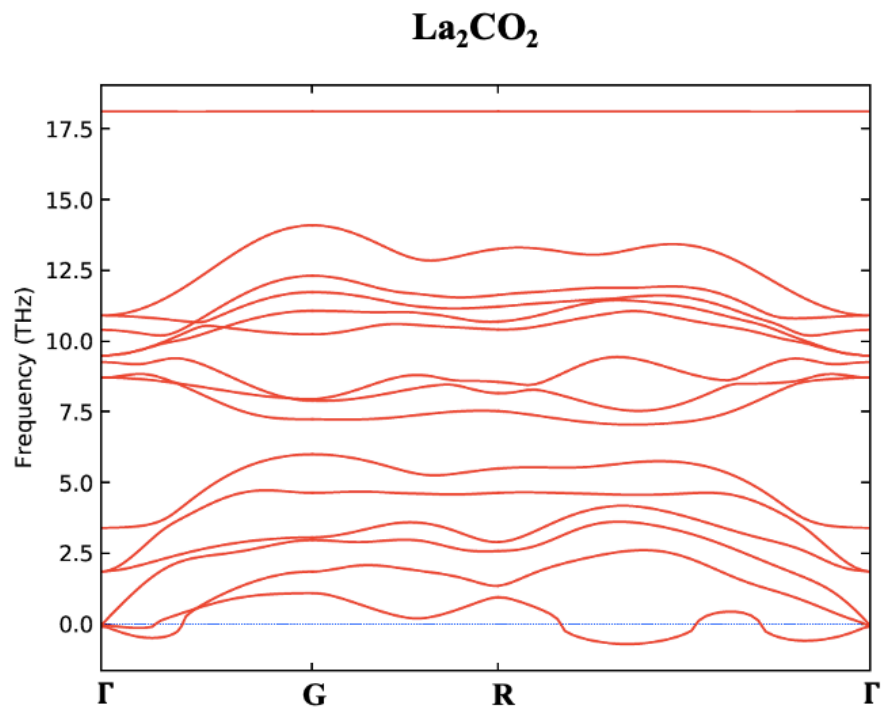

Figure S24. Phonon frequencies for La<sub>2</sub>CO<sub>2</sub> in the mixed phase.

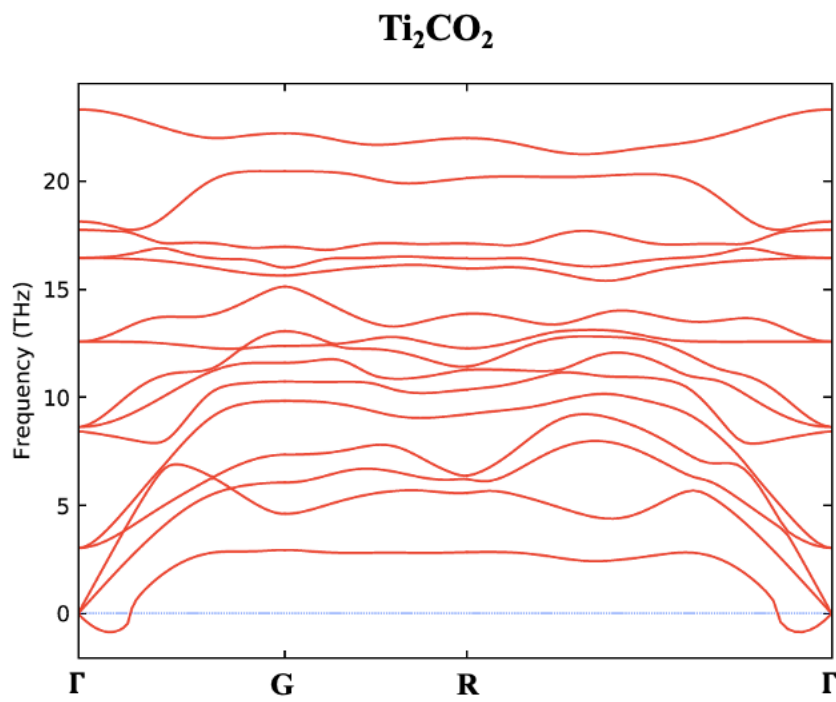

Figure S25. Phonon frequencies for Ti<sub>2</sub>CO<sub>2</sub> in the mixed phase.

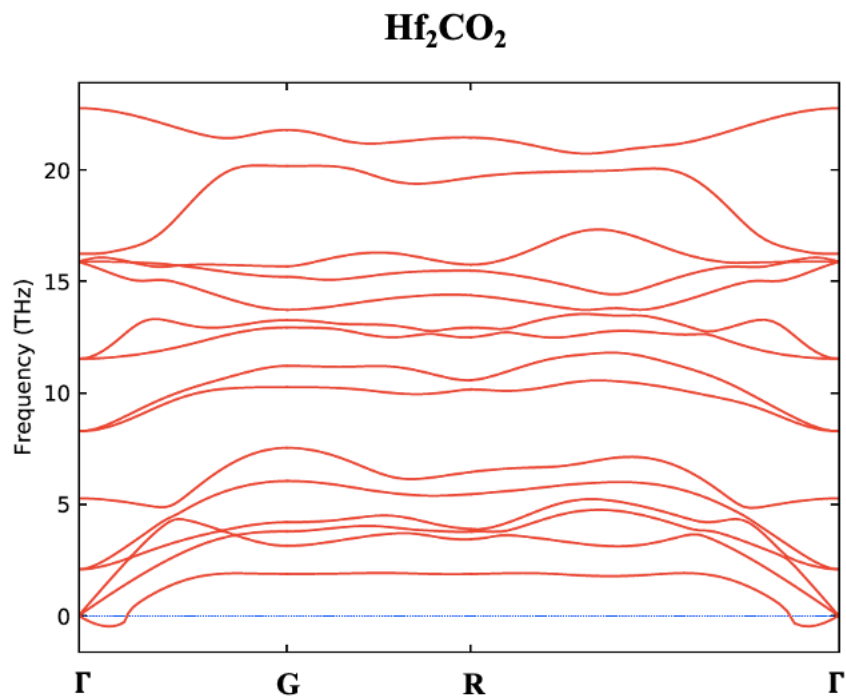

Figure S26. Phonon frequencies for Hf<sub>2</sub>CO<sub>2</sub> in the mixed phase.

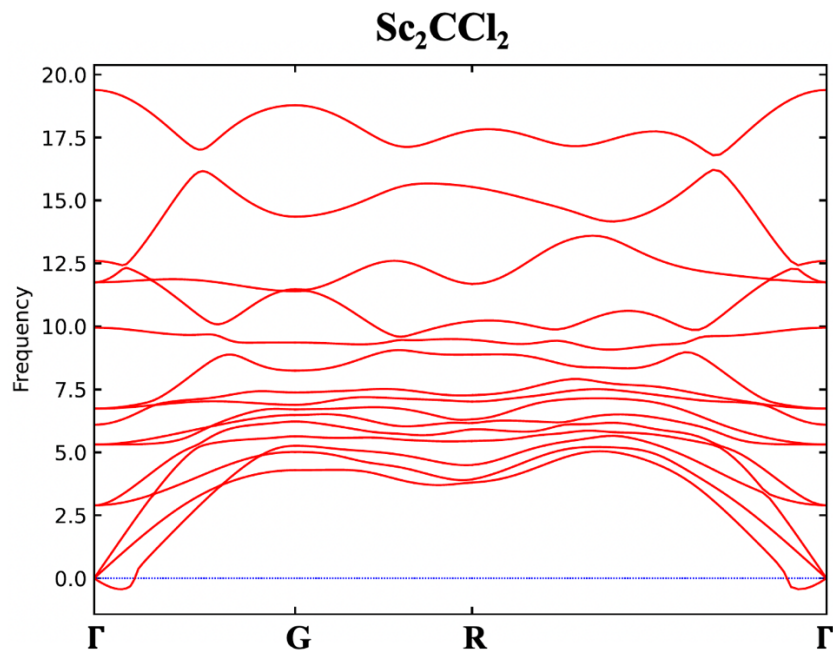

Figure S27. Phonon frequencies for Sc<sub>2</sub>CCl<sub>2</sub> in the mixed phase.

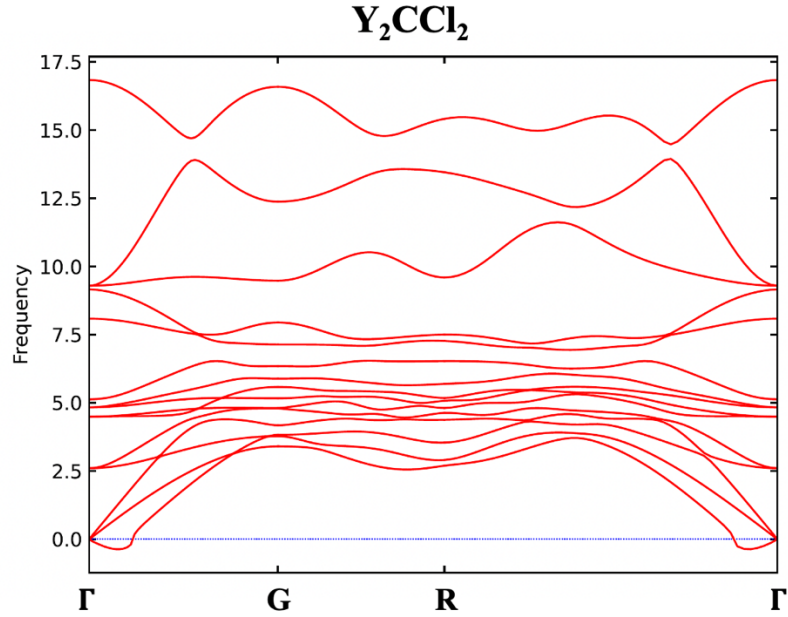

Figure S28. Phonon frequencies for Y<sub>2</sub>CCl<sub>2</sub> in the mixed phase.

Table S1. Born effective charges for mixed phase compounds not reported in the main text.

|                                  |         | Born effective charges |       |       |
|----------------------------------|---------|------------------------|-------|-------|
|                                  | Element | Z11                    | Z22   | Z33   |
| Sc <sub>2</sub> CF <sub>2</sub>  | C       | -5.33                  | -5.31 | -0.44 |
|                                  | F1      | -1.05                  | -1.11 | -0.52 |
|                                  | F2      | -1.77                  | -1.76 | -0.50 |
|                                  | Sc1     | 4.36                   | 4.36  | 0.73  |
|                                  | Sc2     | 3.78                   | 3.82  | 0.72  |
| SC <sub>2</sub> CCl <sub>2</sub> | C       | -5.51                  | -5.51 | -0.46 |
|                                  | Cl1     | -1.08                  | -1.08 | -0.29 |
|                                  | Cl2     | -1.57                  | -1.57 | -0.27 |
|                                  | Sc1     | 4.35                   | 4.35  | 0.52  |
|                                  | Sc2     | 3.82                   | 3.82  | 0.50  |
| Y <sub>2</sub> CF <sub>2</sub>   | C       | -5.38                  | -5.38 | -0.47 |
|                                  | F1      | -0.99                  | -0.99 | -0.58 |
|                                  | F2      | -1.81                  | -1.81 | -0.55 |
|                                  | Y1      | 4.42                   | 4.42  | 0.80  |
|                                  | Y2      | 3.76                   | 3.76  | 0.80  |

|        |     |       |       |       |
|--------|-----|-------|-------|-------|
| Y2CCl2 | C   | -5.62 | -5.62 | -0.52 |
|        | Cl1 | -1.06 | -1.06 | -0.37 |
|        | Cl2 | -1.60 | -1.60 | -0.35 |
|        | Y1  | 4.42  | 4.42  | 0.63  |
|        | Y2  | 3.86  | 3.86  | 0.62  |
| Ti2CO2 | C   | -4.36 | -4.36 | -0.21 |
|        | O1  | -2.32 | -2.33 | -0.38 |
|        | O2  | -4.26 | -4.25 | -0.38 |
|        | Ti1 | 6.95  | 6.95  | 0.53  |
|        | Ti2 | 3.99  | 3.99  | 0.43  |
| Hf2CO2 | C   | -4.44 | -4.44 | -0.37 |
|        | O1  | -2.21 | -2.21 | -0.51 |
|        | O2  | -3.53 | -3.53 | -0.52 |
|        | Hf1 | 5.90  | 5.90  | 0.75  |
|        | Hf2 | 4.28  | 4.28  | 0.66  |

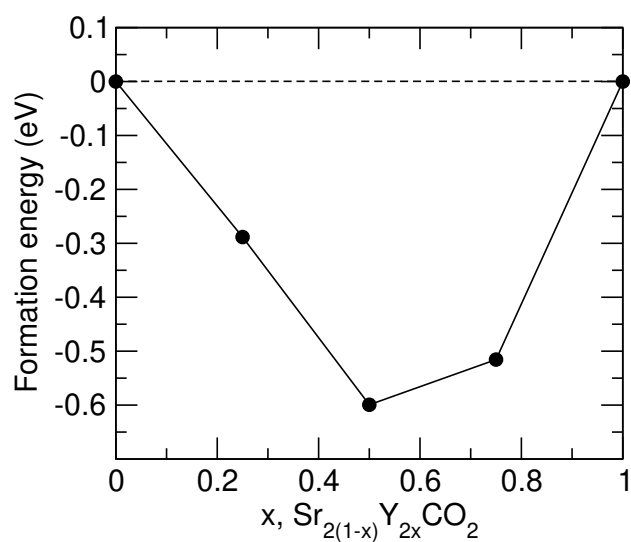

Figure S29. Formation energy of Sr<sub>2(1-x)</sub>Y<sub>2x</sub>CO<sub>2</sub> alloys as a function of concentration.

$\text{Sr}_{0.75}\text{Y}_{0.25}\text{CO}_2$

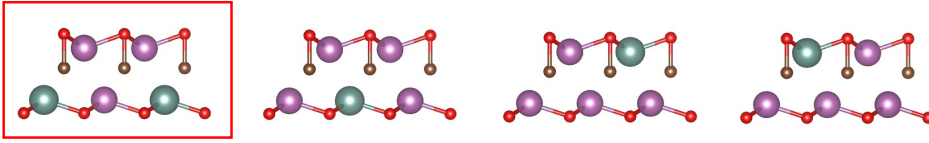

$\text{Sr}_{0.5}\text{Y}_{0.5}\text{CO}_2$

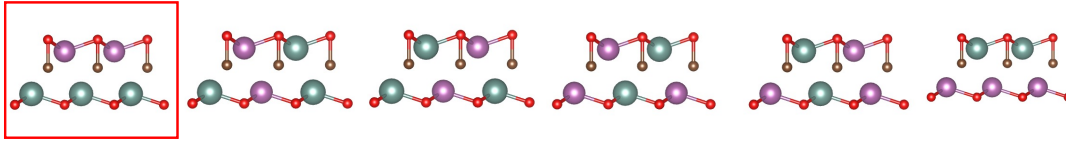

$\text{Sr}_{0.25}\text{Y}_{0.75}\text{CO}_2$

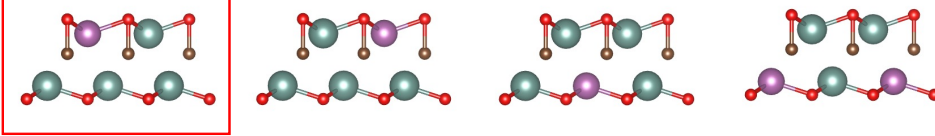

Figure S30. Relaxed structures of all  $\text{Sr}_{2(1-x)}\text{Y}_{2x}\text{CO}_2$  alloy structures tested in the mixed phase. The lowest energy structure is circled in red.

$\text{Sr}_{0.75}\text{Y}_{0.25}\text{CO}_2$

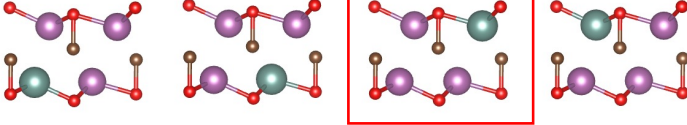

$\text{Sr}_{0.5}\text{Y}_{0.5}\text{CO}_2$

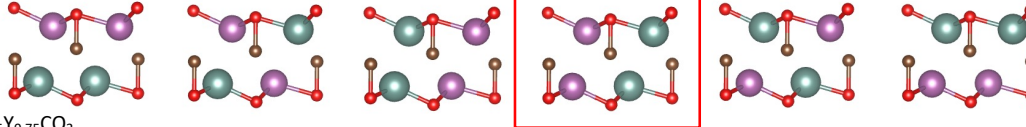

$\text{Sr}_{0.25}\text{Y}_{0.75}\text{CO}_2$

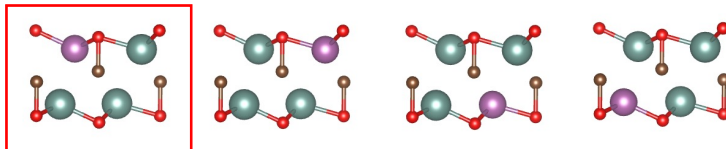

Figure S31. Relaxed structures of all  $\text{Sr}_{2(1-x)}\text{Y}_{2x}\text{CO}_2$  alloy structures tested in the asymmetric phase. The lowest energy structure is circled in red.

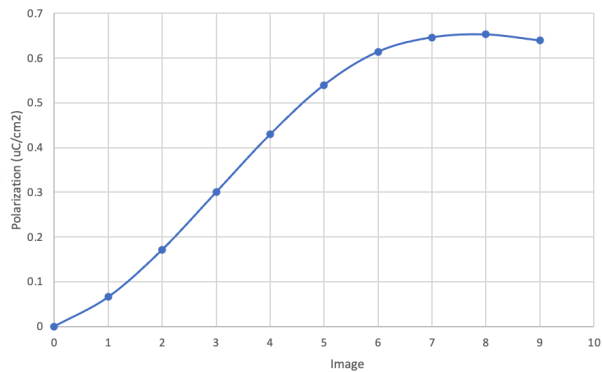

Figure S32. Polarization quantum for  $\text{Sc}_2\text{CO}_2$ .



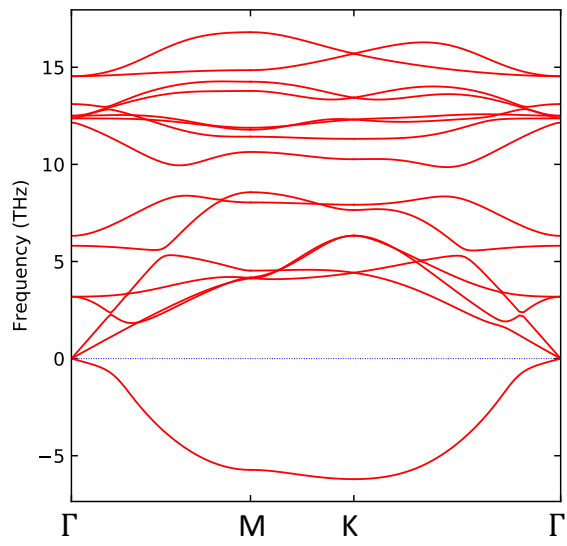

Figure S33. Phonon band structure of the  $Y_2CO_2$  symmetric phase.
